# Supplementary material for: Characterizing space-time patterns of nitrogen oxides (NO 2 and NO) pollution in Kigali, Rwanda
Source: Research Square preprint supplement (doi:10.21203/rs.3.rs-8828727/v1), 2026-02-23
Supplement: Supplementary file 1 [file 4a416cc5bfffb819162547e7.docx]

**Supplementary Information**

**Characterizing space-time patterns of nitrogen oxides (NO2 and NO) pollution in Kigali, Rwanda**

Pacifique Karekezi1,2, Kate A Kyeremateng3,4, Carissa L Lange3, Chantal Umutoni1,2, Jean Remy Kubwimana1,2, James Nimo5,6, Jiayuan Wang3, Barbara E Mottey3, Paterne Gahungu2,7, Silas S Mirau1, Claudette Nyinawumuntu2, Samson Niyizirugero2, Pie-Celestin Hakizimana8, Isambi S Mbalawata2, Majid Ezzati9-12, Allison F Hughes5, Raphael E Arku3,*

1School of Computational and Communication Science and Engineering, The Nelson Mandela African Institution of Science and Technology, Arusha, Tanzania

2African Institute for Mathematical Sciences, Research and Innovation Centre, Kigali, Rwanda

3Department of Environmental Health Sciences, University of Massachusetts, Amherst, MA, USA

4Department of Biostatistics and Epidemiology, University of Massachusetts, Amherst, MA, USA

5Department of Physics, University of Ghana, Accra, Ghana

6Department of Environmental & Sustainable Engineering, State University of New York, Albany, USA

7Department of Mathematics, Faculty of Natural Sciences, Imperial College London, London, UK

8Rwanda Environment Management Authority, Kigali, Rwanda

9Department of Epidemiology and Biostatistics, School of Public Health, Imperial College London, London, UK

10Regional Institute for Population Studies, University of Ghana, Accra, Ghana

11 MRC Centre for Environment and Health, School of Public Health, Imperial College London, London, UK

12Imperial Global Ghana, Accra, Ghana

* Correspondence to:

Raphael E Arku

School of Public Health and Health Sciences

University of Massachusetts Amherst, MA, USA

E-mail: rarku@umass.edu

**Overview**

The Kigali air quality monitoring campaign was conducted from November 2022 to December 2023 using Ogawa passive samplers to collect weekly NOX measurements, following the measurement protocol previously applied in Accra, Ghana. The monitoring network comprised 10 fixed sites, operated continuously throughout the year to capture temporal variability, and 120 rotating sites, each sampled for one week to enhance spatial coverage. Descriptive analyses were performed to examine the space-time patterns of NO2 and NO pollution in relation to land use and source features across the city of Kigali to inform future city planning and policy goals.


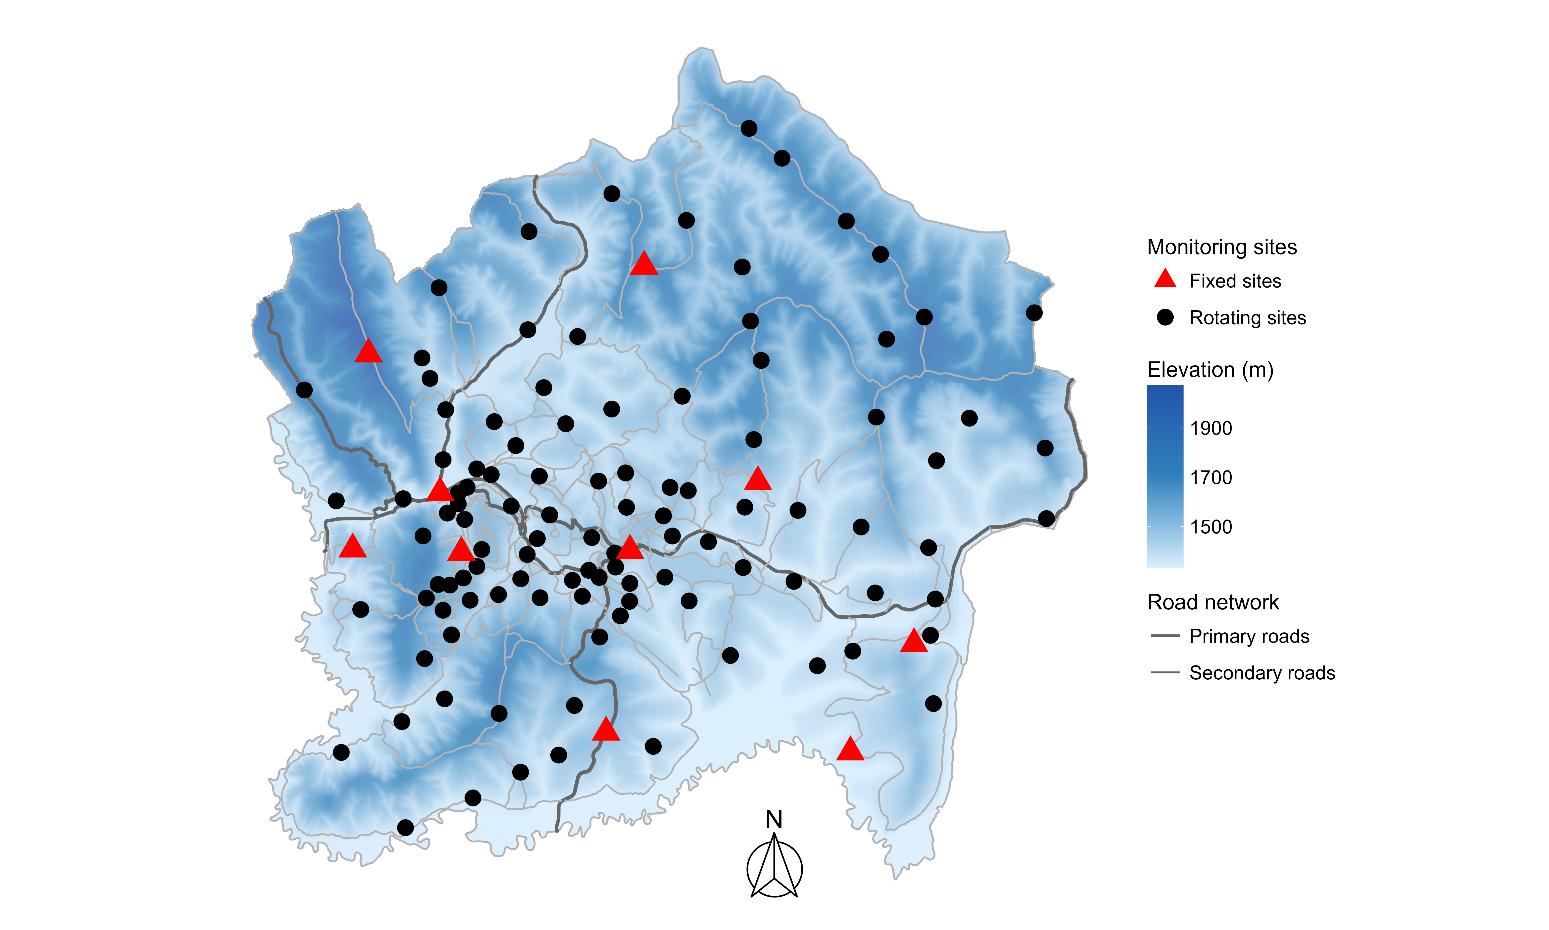


**Figure S1.** Spatial distribution of fixed (red) and rotating (black) air quality monitoring sites across Kigali, shown in relation to elevation, primary and secondary road network.

**Descripive analysis**

**Spatial analysis**

Pairwise comparisons among land-use categories revealed distinct patterns between fixed and rotating sites. At fixed sites, all pairwise comparisons were statistically significant for NO₂. In contrast, for NO, concentrations were statistically similar only between BKG and LDR. At rotating sites, significant differences in NO concentrations were observed only between BKG and CBI and between BKG and HDR. For NO₂ at rotating sites, significant differences were detected between BKG and CBI, BKG and HDR, and BKG and LDR (all p < 0.001), as well as between HDR and LDR (p = 0.006). No significant differences were found between CBI and HDR or between CBI and LDR (p = 0.340). Overall, fixed sites exhibited stronger and more consistent contrasts across land-use categories compared with rotating sites (Table S1)

**Table S1.** Pairwise comparisons of NO and NO₂ concentrations across land-use categories at fixed and rotating sites, p-values are shown.

| Site Type | Pollutant | Comparison | n1 | n2 | p-value |
| --- | --- | --- | --- | --- | --- |
| Fixed | NO | BKG vs CBI | 133 | 140 | <0.001 |
|  |  | BKG vs HDR | 133 | 44 | <0.001 |
|  |  | CBI vs HDR | 140 | 44 | <0.001 |
|  |  | BKG vs LDR | 133 | 147 | 0.241 |
|  |  | CBI vs LDR | 140 | 147 | <0.001 |
|  |  | HDR vs LDR | 44 | 147 | <0.001 |
| Fixed | NO₂ | BKG vs CBI | 133 | 140 | <0.001 |
|  |  | BKG vs HDR | 133 | 44 | <0.001 |
|  |  | CBI vs HDR | 140 | 44 | <0.001 |
|  |  | BKG vs LDR | 133 | 147 | <0.001 |
| Site Type | Pollutant | Comparison | n1 | n2 | p-value |
|  |  | CBI vs LDR | 140 | 147 | <0.001 |
|  |  | HDR vs LDR | 44 | 147 | <0.001 |
| Rotating | NO | BKG vs CBI | 29 | 14 | <0.001 |
|  |  | BKG vs HDR | 29 | 22 | <0.001 |
|  |  | CBI vs HDR | 14 | 22 | 0.616 |
|  |  | BKG vs LDR | 29 | 41 | 0.063 |
|  |  | CBI vs LDR | 14 | 41 | 0.059 |
|  |  | HDR vs LDR | 22 | 41 | 0.063 |
| Rotating | NO₂ | BKG vs CBI | 29 | 14 | <0.001 |
|  |  | BKG vs HDR | 29 | 22 | <0.001 |
|  |  | CBI vs HDR | 14 | 22 | 0.340 |
|  |  | BKG vs LDR | 29 | 41 | <0.001 |
|  |  | CBI vs LDR | 14 | 41 | 0.340 |
|  |  | HDR vs LDR | 22 | 41 | 0.006 |

*n1 and* n2 *denote the number of observations included in each comparison*.

The NO/NOₓ ratio remained relatively constant across land-use categories at rotating sites, but varied significantly at fixed sites. For fixed sites, the only non-significant pairwise difference was observed between HDR and BKG areas. In contrast, for rotating sites, no statistically significant differences were detected among land-use categories, despite differences in mean values (Table S2).

**Table S2.** Pairwise comparisons of the NO/NOₓ ratio between site types using one-way ANOVA with post-hoc tests.

| Site type | Comparison | p-value |
| --- | --- | --- |
| **Fixed sites** | Overall | <0.001 |
|  | BKG vs CBI | <0.001 |
|  | BKG vs HDR | 0.39 |
|  | CBI vs HDR | <0.001 |
|  | BKG vs LDR | 0.02 |
|  | CBI vs LDR | <0.001 |
|  | HDR vs LDR | 0.02 |
| **Rotating sites** | Overall | 0.17 |
|  | BKG vs CBI | 0.89 |
|  | BKG vs HDR | 0.79 |
|  | CBI vs HDR | 0.89 |
|  | BKG vs LDR | 0.21 |
|  | CBI vs LDR | 0.55 |
|  | HDR vs LDR | 0.43 |

Generally, **48.5% of all fixed-site samples** exceed the WHO annual guideline, while **53.8% of rotating-site samples** are above this threshold. The highest percentages are observed in **HDR and CBI areas,** while the lowest are found in **background areas (Table S3)**.

**Table S3.** Number and percentage of NO₂ samples exceeding the WHO guideline threshold across land-use categories for fixed and rotating monitoring sites.

| **Site Type** | **Category** | **Total Samples** | **Samples Exceeding WHO Threshold** | **% Exceeding WHO Threshold** |
| --- | --- | --- | --- | --- |
| Fixed | BKG | 133 | 6 | 4.5 |
|  | LDR | 147 | 49 | 33.3 |
|  | CBI | 140 | 126 | 90.0 |
|  | HDR | 44 | 44 | 100.0 |
|  | Overall | 464 | 225 | 48.5 |
| Rotating | BKG | 29 | 0 | 0.0 |
|  | CBI | 14 | 11 | 78.6 |
|  | LDR | 41 | 25 | 61.0 |
|  | HDR | 22 | 21 | 95.5 |
|  | Overall | 106 | 57 | 53.8 |

Concentrations of both NO and NO₂ decreased with increasing distance from the primary road. Higher mean concentrations were observed at sites closer to the road, while lower concentrations were observed at more distant sites. For NO₂, differences were statistically significant across all distances (100 m to 1000 m; p < 0.05). In contrast, for NO, significant differences were observed only from 500 m onward, indicating that distinctions between near-road and more distant sites for NO concentrations become more pronounced at larger distances (Table S4).

**Table S4.** Table showing mean NO and NO₂ concentrations (µg/m³) at sites located 100–1000 m from the primary road, with standard deviations and pairwise comparison p-values.

| **Distance (m)** | **NO₂ (µg/m³)** | **NO (µg/m³)** | **N₁** | **N₂** | **p-value NO₂** | **p-value NO** |
| --- | --- | --- | --- | --- | --- | --- |
| 100 | 20.30 (9.48) | 7.79 (8.24) | 11 | 105 | 0.02 | 0.16 |
| 200 | 19.90 (8.52) | 7.53 (7.82) | 16 | 100 | <0.001 | 0.08 |
| 300 | 19.70 (7.88) | 7.01 (7.08) | 20 | 96 | <0.001 | 0.06 |
| 400 | 19.50 (8.01) | 6.24 (6.52) | 25 | 91 | <0.001 | 0.09 |
| 500 | 19.50 (7.58) | 6.48 (6.30) | 29 | 87 | <0.001 | 0.03 |
| 600 | 19.80 (7.65) | 6.34 (6.23) | 30 | 86 | <0.001 | 0.03 |
| 700 | 19.90 (7.43) | 6.56 (6.10) | 32 | 84 | <0.001 | 0.01 |
| 800 | 19.70 (7.42) | 6.46 (6.03) | 33 | 83 | <0.001 | 0.01 |
| 900 | 19.30 (7.28) | 6.58 (6.09) | 36 | 80 | <0.001 | 0.01 |
| 1000 | 19.30 (6.99) | 6.82 (6.02) | 39 | 77 | <0.001 | 0.00 |

***N₁****: number of measurements closer to the road*

***N₂****: number of measurements farther from the road*

.


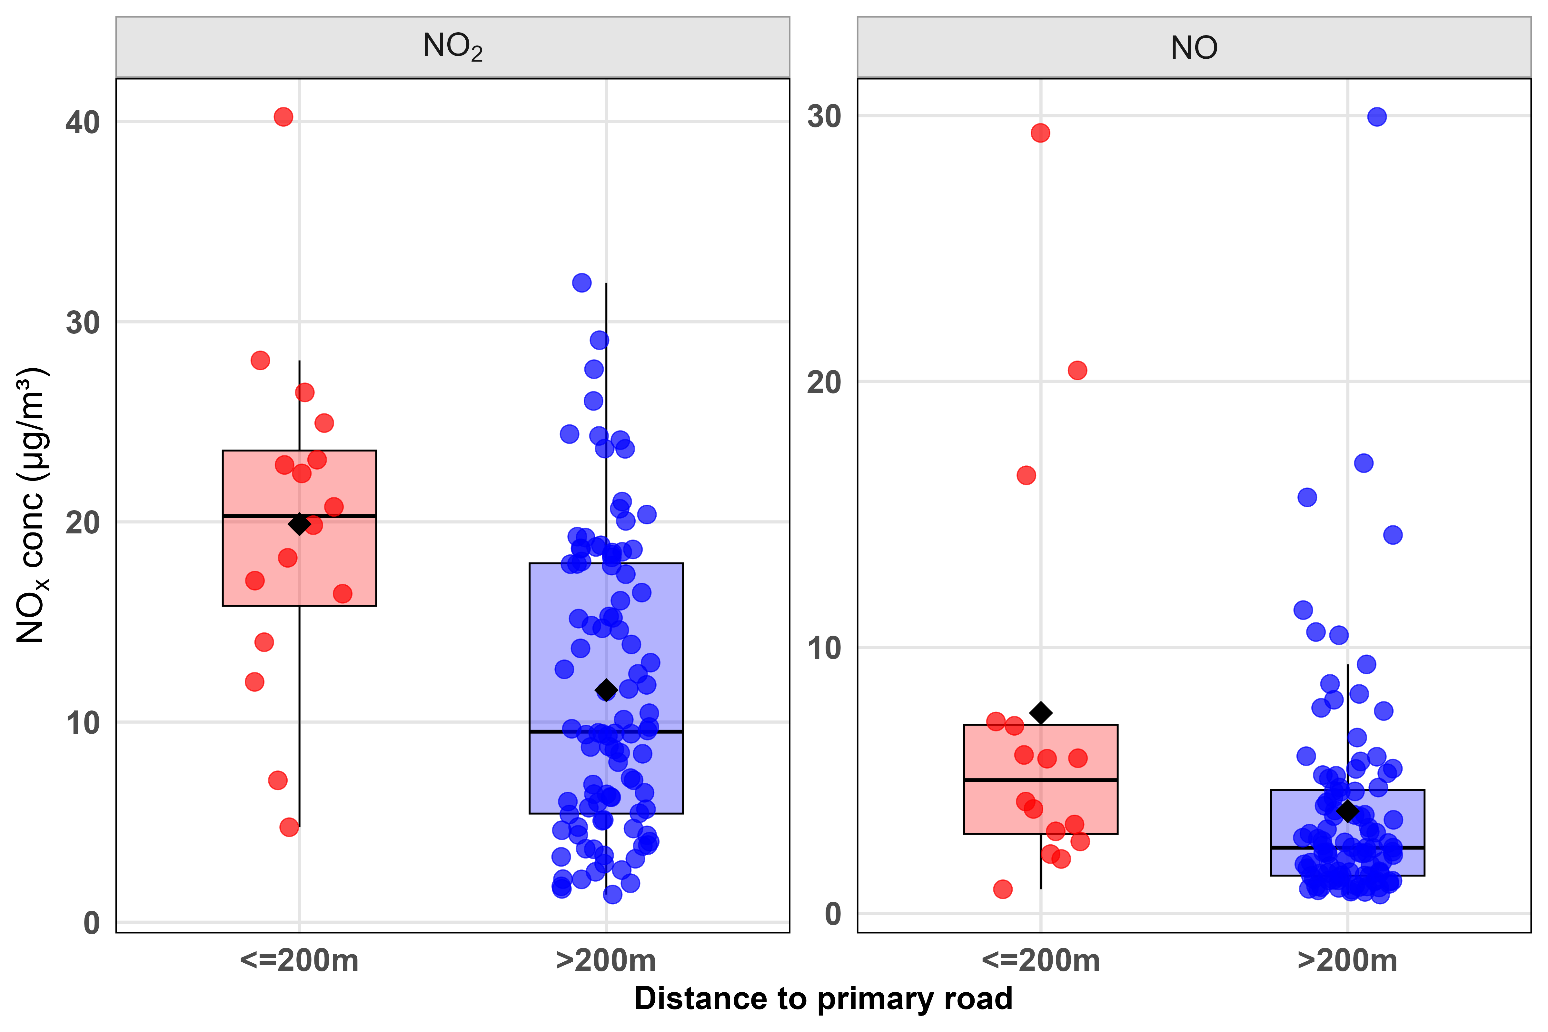


**Figure S2.** Scatter plots of NO₂ concentrations (μg/m³) by distance from primary roads (≤200 m and >200 m)

**Temporal analysis**

Overall seasonal difference were observed between the dry and rainy seasons. At the category level, significant differences in NO₂ were found in residential areas (HDR and LDR). Significant differences in NO were observed in BKG areas, CBI, and LDR (Table S5, Figure S2).

**Table S5.** Mean concentrations of NO₂ and NO (µg/m³) in dry and rainy seasons across different site categories. Includes standard deviations, sample size, mean differences (Dry − Rainy), and p-values for overall and category-specific comparisons.

| Category | Dry Season (µg/m³) | Rainy Season (µg/m³) | n (Dry) | n (Rainy) | Difference (Dry − Rainy) | p-value |
| --- | --- | --- | --- | --- | --- | --- |
| **NO₂ (Overall)** | **15.40 (13.10)** | **12.90 (10.80)** | **237** | **227** | **2.50** | **0.03** |
| BKG | 4.31 (2.25) | 4.21 (2.40) | 67 | 66 | 0.10 | 0.80 |
| CBI | 28.40 (14.30) | 24.90 (11.90) | 74 | 66 | 3.47 | 0.12 |
| HDR | 23.30 (4.83) | 18.00 (2.77) | 22 | 22 | 5.37 | <0.001 |
| LDR | 10.20 (2.80) | 8.45 (1.97) | 74 | 73 | 1.74 | <0.001 |
| **NO (Overall)** | **5.18 (7.08)** | **8.22 (11.20)** | **237** | **227** | **−3.04** | **<0.001** |
| BKG | 0.90 (0.58) | 1.81 (1.29) | 67 | 66 | −0.91 | <0.001 |
| CBI | 12.20 (9.02) | 20.90 (13.90) | 74 | 66 | −8.76 | <0.001 |
| HDR | 6.07 (2.14) | 7.15 (1.53) | 22 | 22 | −1.08 | 0.06 |
| LDR | 1.79 (1.02) | 2.85 (1.73) | 74 | 73 | −1.06 | <0.001 |

**
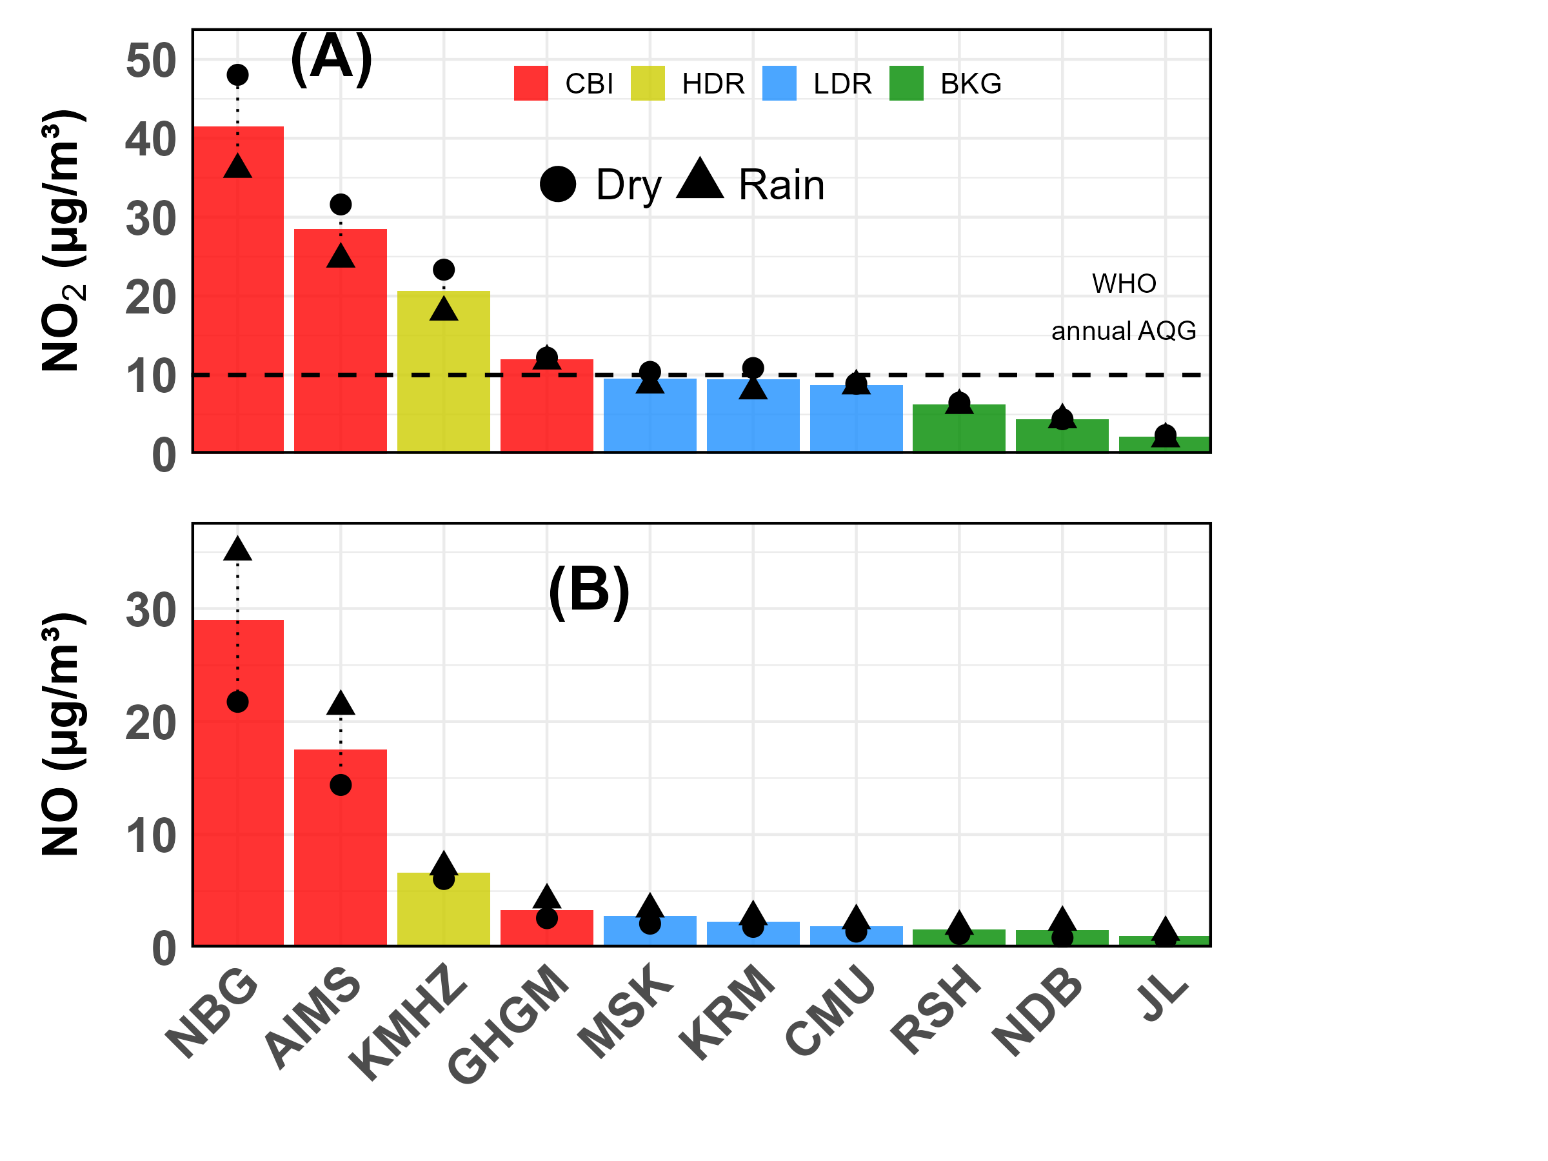
**

***NBG: Nyabugogo***

***AIMS: African Institute for Mathematical Science (former location)***

***KMHZ: Kamuhoza***

***MSK: Masaka***

***KRM: Karama***

***CMU: Carnegy Melon University***

***RSH: Rusheshe***

***NDB: Nduba***

***JL: Jali***

**Figure S3.** Annual, dry season, and rainy season mean NO2 (A) and NO (B) at all fixed sites across the four land-use categories.


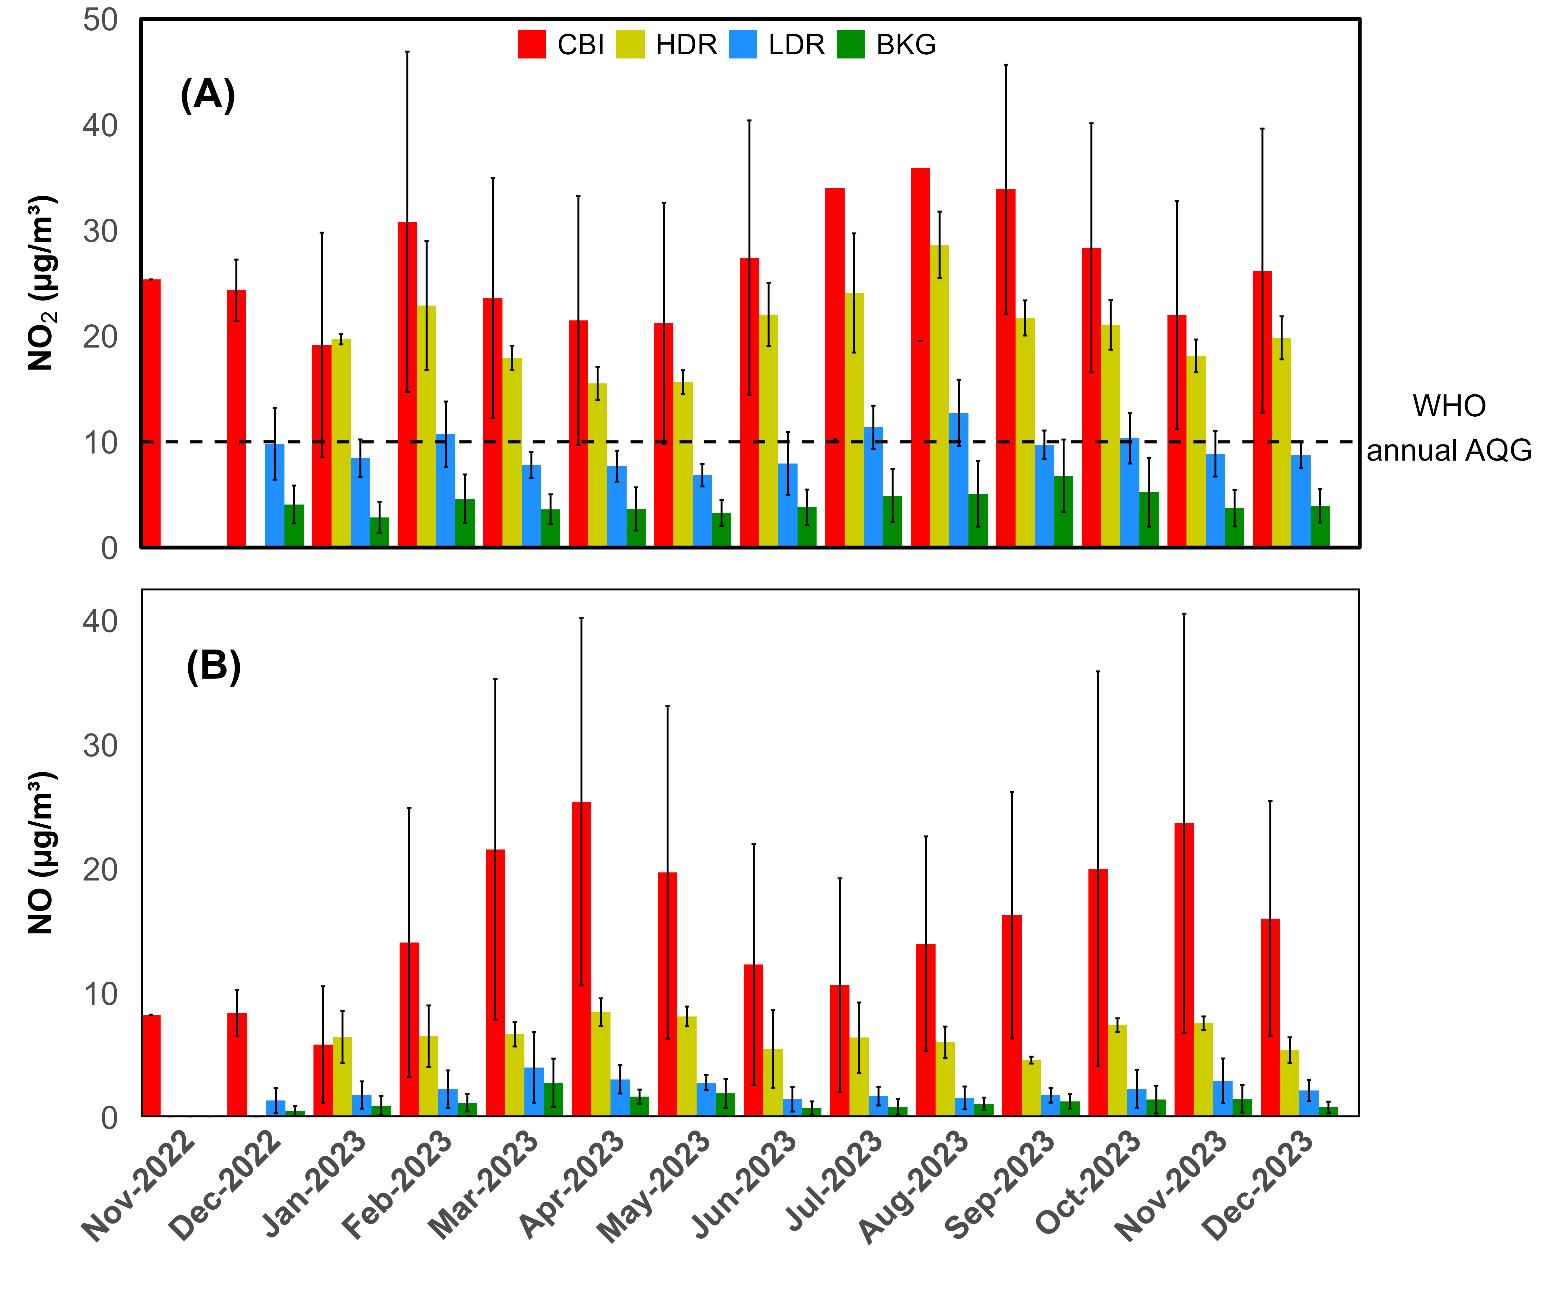


**Figure S4.** Monthly mean NO₂(A) and NO(B) concentrations at fixed sites across the four land-use categories and the WHO annual guideline for NO2.

The NO/NOₓ ratio varied over time, with higher values during the rainy season and lower values during the dry season. The highest NO/NOₓ ratios were consistently observed in CBI areas, while the lowest values were found in LDR areas (Figure S4)


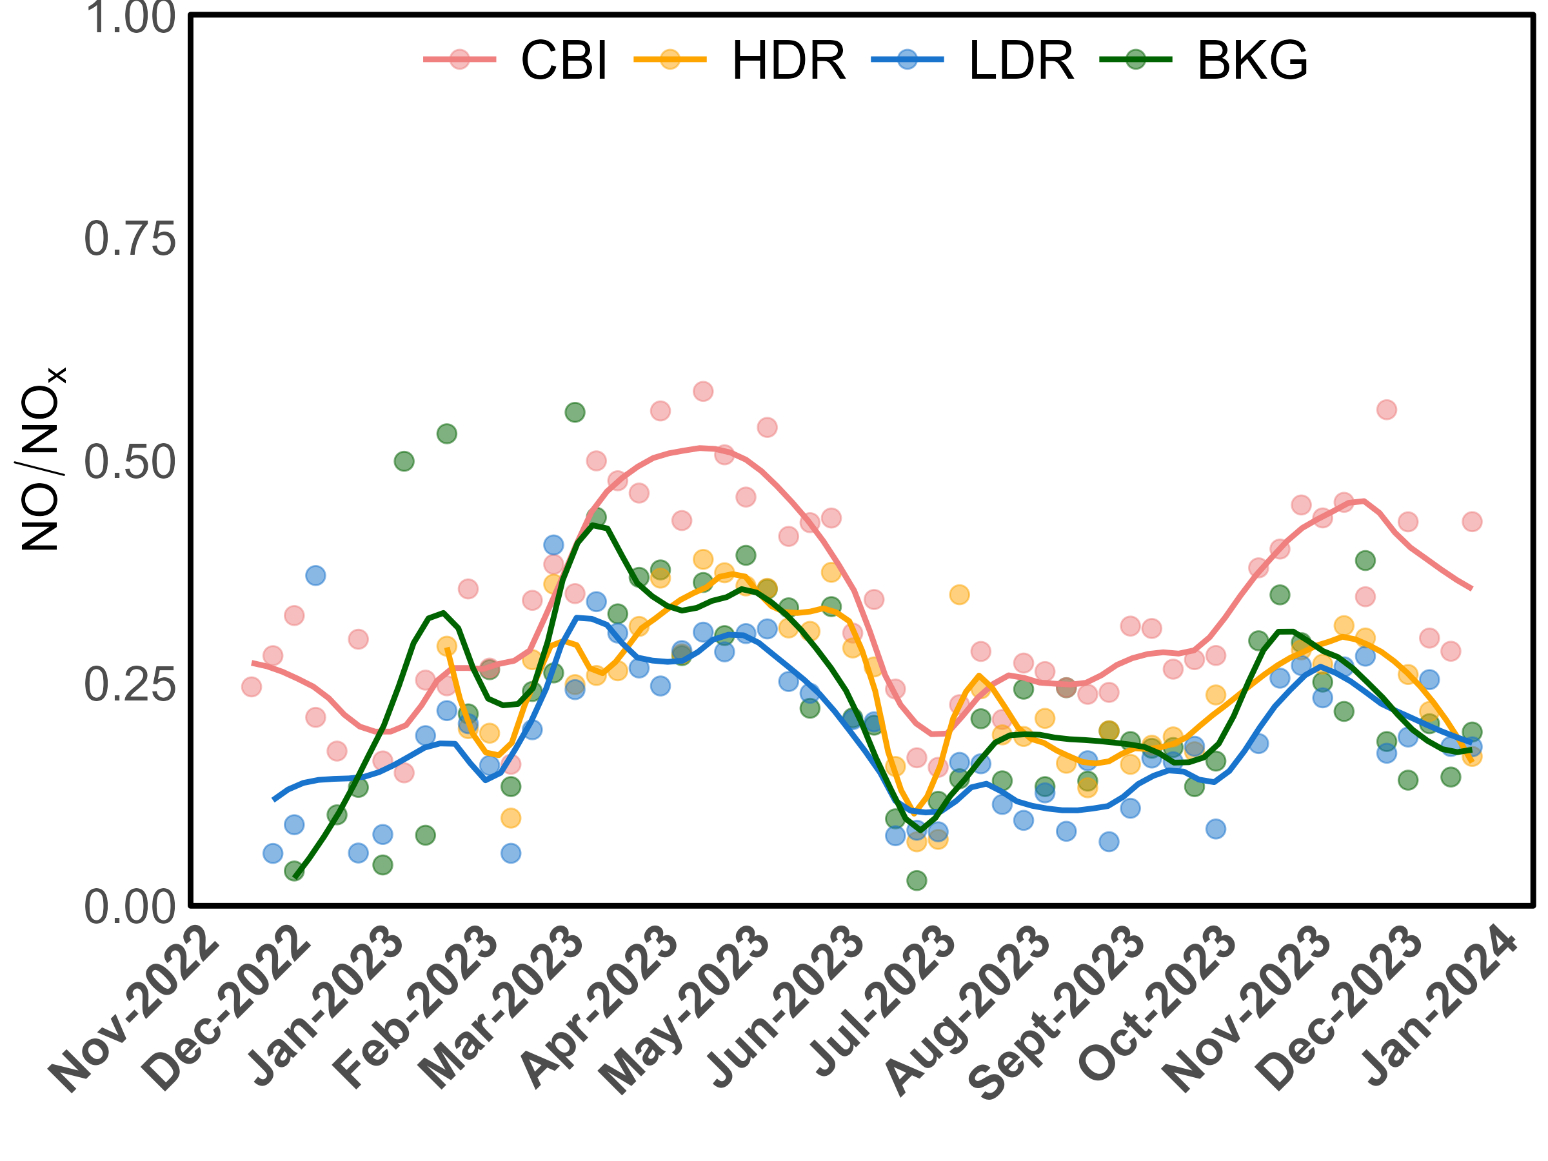


**Figure S5.** Temporal trends of the NO/NOₓ ratio across four land-use categories.
